# Supplementary material for: Geographic variation in dengue seroprevalence and force of infection in the urban paediatric population of Indonesia
Source: PLoS Negl Trop Dis. 2018 Nov 2;12(11):e0006932. doi: 10.1371/journal.pntd.0006932 (PMC6241133; doi:10.1371/journal.pntd.0006932)
Supplement: S2 File — (CSV) [file pntd.0006932.s003.csv]

cluster_id	regency	status	popden	sanitation	safewater	hh_expend	hdi	vax_cover
1	SUBULUSSALAM	City	48.5	62.36	42.62	478944.9	69.63	77.37
2	MEDAN	City	7915.5	91.03	96.29	976107.4	77.36	94.57
3	PADANG	City	1201.7	73.75	86.63	1038883.6	78.15	90.29
4	BUNGO	Regency	65.1	67.85	65.4	785073.6	72.5	90.11
5	LAMPUNG SELATAN	Regency	1303	82.6	52.3	521272.3	70.53	95.1
6	TANGERANG	City	11684.5	83.4	85.6	1018837.8	75.44	94.8
7	TANGERANG	City	11684.5	83.4	85.6	1018837.8	75.44	94.8
8	JAKARTA SELATAN	City district	13363.3	84.9	86.3	1951395.8	NA	95.1
9	JAKARTA TIMUR	City district	14744.9	84.6	90.5	1278851.4	NA	97.4
10	JAKARTA BARAT	City district	18337.7	72.5	94.5	1485922.4	NA	98.4
11	BOGOR	City	8019.7	79.7	73.9	811084.2	76.08	99.1
12	BANDUNG	Regency	1797.9	71.1	89.7	1190553.1	75.35	99.5
13	CIREBON	City	7933.3	78.3	93.5	657564.2	75.42	92.9
14	BEKASI	Regency	2147.5	80.2	87.1	863028.5	73.54	93.3
15	BANDUNG	City	14283.3	73.1	89.6	1173600.2	76.39	97.5
16	BEKASI	Regency	2147.5	80.2	87.1	863028.5	73.54	93.3
17	TASIKMALAYA	Regency	656.8	54.5	36.7	427575.8	72.51	94.5
18	KLATEN	Regency	1716.8	68.7	65.5	608152.5	74.1	99.6
19	JEPARA	Regency	1035.9	72.4	72	517840.9	73.12	98.4
20	TEGAL	Regency	1592.1	67.3	55.2	462158.6	71.09	96.3
21	TEGAL	City	6038.3	63.9	95.2	743161.6	74.2	100
22	PONOROGO	Regency	655	73.9	78.8	475130.9	71.15	98.6
23	BANYUWANGI	Regency	269.1	64.9	73	590300.6	69.58	98.7
24	MOJOKERTO	Regency	1428.5	76.4	74.4	646977.3	73.89	96.9
25	SUMENEP	Regency	521.5	42.1	60	369646.3	66.01	87.9
26	SURABAYA	City	7889.2	70.8	99.9	1024074.4	74.85	99.5
27	DENPASAR	City	6171.5	80.1	97.5	1350210.6	78.31	99.7
28	SAMARINDA	City	929.1	88.6	98.2	1231664.4	78.85	98.5
29	TORAJA UTARA	Regency	178.3	76.6	41.9	413094.4	78.19	100
30	KENDARI	City	963.7	69.9	87.2	886490.3	69.33	98.6
