# Supplementary material for: Geographic variation in dengue seroprevalence and force of infection in the urban paediatric population of Indonesia
Source: PLoS Negl Trop Dis. 2018 Nov 2;12(11):e0006932. doi: 10.1371/journal.pntd.0006932 (PMC6241133; doi:10.1371/journal.pntd.0006932)
Supplement: S3 File — (CSV) [file pntd.0006932.s004.csv]

cluster_id	age	neg	pos	total
1	2	6	2	8
1	3	5	1	6
1	4	5	2	7
1	5	3	4	7
1	6	2	1	3
1	7	2	3	5
1	8	3	3	6
1	9	4	6	10
1	10	3	6	9
1	11	0	5	5
1	12	1	5	6
1	13	0	3	3
1	14	0	4	4
1	15	0	7	7
1	16	0	7	7
1	17	4	7	11
1	18	0	2	2
10	1	1	0	1
10	2	5	2	7
10	3	6	1	7
10	4	6	1	7
10	5	2	0	2
10	6	4	7	11
10	7	1	3	4
10	8	4	2	6
10	9	3	4	7
10	10	0	9	9
10	11	1	9	10
10	13	0	1	1
10	14	1	8	9
10	15	1	11	12
10	16	0	6	6
10	17	1	7	8
11	1	1	4	5
11	2	0	5	5
11	3	1	3	4
11	4	4	4	8
11	5	3	2	5
11	6	1	3	4
11	7	5	7	12
11	8	0	5	5
11	9	0	3	3
11	10	3	3	6
11	11	2	1	3
11	12	0	4	4
11	13	1	5	6
11	14	1	10	11
11	15	1	12	13
11	16	0	8	8
11	17	0	1	1
11	18	0	4	4
12	1	2	1	3
12	2	2	3	5
12	3	6	3	9
12	4	4	1	5
12	5	5	2	7
12	6	0	6	6
12	7	4	3	7
12	8	4	2	6
12	9	1	2	3
12	10	4	5	9
12	11	0	7	7
12	12	2	3	5
12	13	0	6	6
12	14	1	3	4
12	15	0	5	5
12	16	1	9	10
12	17	3	5	8
12	18	0	2	2
13	1	6	1	7
13	2	6	2	8
13	3	5	0	5
13	4	3	5	8
13	5	5	4	9
13	6	0	1	1
13	7	1	7	8
13	8	1	3	4
13	9	1	4	5
13	10	1	3	4
13	11	0	6	6
13	12	0	11	11
13	13	0	2	2
13	14	0	8	8
13	15	0	8	8
13	16	0	4	4
13	17	0	7	7
13	18	0	2	2
14	1	1	0	1
14	2	4	2	6
14	3	5	2	7
14	4	6	2	8
14	5	4	1	5
14	6	0	5	5
14	7	0	4	4
14	8	0	3	3
14	9	0	10	10
14	10	0	8	8
14	11	0	3	3
14	12	0	7	7
14	13	1	4	5
14	14	0	7	7
14	15	1	7	8
14	16	1	9	10
14	17	0	6	6
14	18	0	3	3
15	1	3	0	3
15	2	5	0	5
15	3	2	2	4
15	4	4	6	10
15	5	1	5	6
15	6	2	4	6
15	7	1	8	9
15	8	1	5	6
15	9	0	2	2
15	10	0	5	5
15	11	0	7	7
15	12	0	5	5
15	13	0	7	7
15	14	0	5	5
15	15	0	4	4
15	16	0	9	9
15	17	1	8	9
15	18	0	5	5
16	1	3	2	5
16	2	3	2	5
16	3	8	1	9
16	4	1	2	3
16	5	4	1	5
16	6	4	5	9
16	7	3	3	6
16	8	4	3	7
16	9	0	3	3
16	10	0	4	4
16	11	1	4	5
16	12	0	6	6
16	13	0	6	6
16	14	0	8	8
16	15	1	8	9
16	16	2	9	11
16	17	0	4	4
16	18	0	2	2
17	1	2	0	2
17	2	5	1	6
17	3	11	1	12
17	4	1	1	2
17	5	3	2	5
17	6	4	2	6
17	7	6	1	7
17	8	2	5	7
17	9	2	2	4
17	10	6	1	7
17	11	4	1	5
17	12	1	4	5
17	13	2	2	4
17	14	1	7	8
17	15	4	5	9
17	16	1	6	7
17	17	3	3	6
17	18	1	4	5
18	1	6	0	6
18	2	3	0	3
18	3	8	0	8
18	4	5	0	5
18	5	4	0	4
18	6	4	3	7
18	7	1	7	8
18	8	4	2	6
18	9	0	4	4
18	10	3	4	7
18	11	2	4	6
18	12	0	4	4
18	13	1	4	5
18	14	0	7	7
18	15	1	8	9
18	16	0	10	10
18	17	0	6	6
18	18	0	2	2
19	1	3	0	3
19	2	6	2	8
19	3	7	2	9
19	4	2	1	3
19	5	3	3	6
19	6	1	3	4
19	7	1	6	7
19	8	2	7	9
19	9	1	4	5
19	10	0	5	5
19	11	0	4	4
19	12	0	5	5
19	13	0	8	8
19	14	0	7	7
19	15	0	9	9
19	16	0	8	8
19	17	0	7	7
2	1	2	2	4
2	2	4	0	4
2	3	2	2	4
2	4	4	6	10
2	5	3	5	8
2	6	4	4	8
2	7	0	4	4
2	8	1	2	3
2	9	0	7	7
2	10	1	6	7
2	11	1	2	3
2	12	1	7	8
2	13	1	5	6
2	14	0	4	4
2	15	2	7	9
2	16	0	11	11
2	17	0	6	6
2	18	0	1	1
20	1	2	2	4
20	2	2	2	4
20	3	3	4	7
20	4	3	4	7
20	5	1	5	6
20	6	1	3	4
20	7	1	4	5
20	8	1	8	9
20	9	1	4	5
20	10	0	5	5
20	11	1	7	8
20	12	0	8	8
20	13	0	7	7
20	14	0	1	1
20	15	0	9	9
20	16	0	10	10
20	17	0	7	7
20	18	0	1	1
21	1	3	3	6
21	2	6	3	9
21	3	2	2	4
21	4	2	1	3
21	5	2	2	4
21	6	1	6	7
21	7	0	6	6
21	8	0	7	7
21	9	0	5	5
21	10	2	4	6
21	11	0	6	6
21	12	0	7	7
21	13	0	5	5
21	14	0	6	6
21	15	0	9	9
21	16	0	9	9
21	17	0	8	8
22	1	3	0	3
22	2	7	2	9
22	3	6	1	7
22	4	1	2	3
22	5	3	1	4
22	6	6	2	8
22	7	6	1	7
22	8	4	1	5
22	9	2	3	5
22	10	3	4	7
22	11	5	2	7
22	12	5	1	6
22	13	1	5	6
22	14	1	2	3
22	15	5	4	9
22	16	6	2	8
22	17	5	4	9
22	18	1	0	1
23	1	6	0	6
23	2	8	0	8
23	3	2	1	3
23	4	4	1	5
23	5	4	0	4
23	6	3	3	6
23	7	1	3	4
23	8	6	4	10
23	9	1	5	6
23	10	1	3	4
23	11	1	4	5
23	12	0	7	7
23	13	0	5	5
23	14	1	7	8
23	15	0	5	5
23	16	1	5	6
23	17	0	9	9
23	18	0	5	5
24	1	12	1	13
24	2	3	1	4
24	3	2	1	3
24	4	1	1	2
24	5	2	2	4
24	6	2	6	8
24	7	2	3	5
24	8	1	4	5
24	9	0	8	8
24	10	0	10	10
24	11	0	7	7
24	12	0	3	3
24	13	0	6	6
24	14	0	3	3
24	15	0	7	7
24	16	0	7	7
24	17	1	9	10
24	18	0	2	2
25	1	5	1	6
25	2	1	0	1
25	3	8	1	9
25	4	6	1	7
25	5	3	4	7
25	6	6	2	8
25	7	0	6	6
25	8	3	0	3
25	9	0	4	4
25	10	2	4	6
25	11	0	2	2
25	12	1	4	5
25	13	2	4	6
25	14	1	10	11
25	15	0	5	5
25	16	0	7	7
25	17	1	7	8
25	18	0	4	4
26	1	3	0	3
26	2	5	5	10
26	3	0	1	1
26	4	0	8	8
26	5	3	3	6
26	6	1	7	8
26	7	0	2	2
26	8	1	7	8
26	9	0	5	5
26	10	1	8	9
26	11	0	3	3
26	12	1	4	5
26	13	1	3	4
26	14	0	8	8
26	15	0	6	6
26	16	0	6	6
26	17	1	10	11
26	18	0	4	4
27	1	3	2	5
27	2	5	2	7
27	3	6	1	7
27	4	2	1	3
27	5	2	6	8
27	6	2	4	6
27	7	2	4	6
27	8	2	3	5
27	9	0	4	4
27	10	2	4	6
27	11	4	5	9
27	12	0	1	1
27	13	0	9	9
27	14	0	5	5
27	15	1	10	11
27	16	2	3	5
27	17	1	9	10
28	2	1	1	2
28	3	9	5	14
28	4	4	2	6
28	5	4	1	5
28	6	3	0	3
28	7	2	3	5
28	8	5	5	10
28	9	3	3	6
28	10	1	5	6
28	11	3	5	8
28	12	0	2	2
28	13	0	5	5
28	14	3	5	8
28	15	1	5	6
28	16	0	9	9
28	17	1	8	9
28	18	0	3	3
29	1	5	0	5
29	2	4	2	6
29	3	5	2	7
29	4	5	0	5
29	5	2	1	3
29	6	1	3	4
29	7	1	3	4
29	8	1	0	1
29	9	5	5	10
29	10	2	4	6
29	11	4	3	7
29	12	5	1	6
29	13	4	4	8
29	14	5	3	8
29	15	1	6	7
29	16	4	6	10
29	17	2	7	9
29	18	1	0	1
3	1	2	0	2
3	2	5	2	7
3	3	4	2	6
3	4	4	4	8
3	5	2	6	8
3	6	0	8	8
3	7	0	4	4
3	8	1	6	7
3	9	1	1	2
3	10	1	5	6
3	11	2	4	6
3	12	1	3	4
3	13	1	3	4
3	14	2	7	9
3	15	3	6	9
3	16	0	9	9
3	17	0	6	6
3	18	0	1	1
30	1	3	2	5
30	2	1	2	3
30	3	2	5	7
30	4	1	5	6
30	5	2	8	10
30	6	2	4	6
30	7	1	4	5
30	8	0	3	3
30	9	0	6	6
30	10	0	5	5
30	11	0	9	9
30	12	0	5	5
30	13	1	7	8
30	14	0	3	3
30	15	0	11	11
30	16	0	6	6
30	17	0	5	5
30	18	0	4	4
4	1	2	1	3
4	2	5	1	6
4	3	5	3	8
4	4	4	4	8
4	5	3	4	7
4	6	4	6	10
4	7	0	3	3
4	8	0	1	1
4	9	0	7	7
4	10	1	5	6
4	11	0	5	5
4	12	0	7	7
4	13	0	5	5
4	14	0	5	5
4	15	1	11	12
4	16	0	9	9
4	17	0	5	5
5	1	2	0	2
5	2	5	0	5
5	3	9	0	9
5	4	5	2	7
5	5	4	2	6
5	6	1	1	2
5	7	4	3	7
5	8	3	3	6
5	9	5	3	8
5	10	0	2	2
5	11	3	3	6
5	12	2	4	6
5	13	3	4	7
5	14	3	7	10
5	15	3	5	8
5	16	2	5	7
5	17	2	2	4
5	18	0	3	3
6	1	0	2	2
6	2	1	4	5
6	3	0	8	8
6	4	4	6	10
6	5	1	2	3
6	6	1	3	4
6	7	0	7	7
6	8	0	5	5
6	9	0	6	6
6	10	2	7	9
6	11	0	4	4
6	12	1	4	5
6	13	1	3	4
6	14	0	9	9
6	15	1	9	10
6	16	1	8	9
6	17	0	4	4
6	18	0	3	3
7	1	2	3	5
7	2	1	1	2
7	3	5	1	6
7	4	5	2	7
7	5	2	3	5
7	6	2	3	5
7	7	4	4	8
7	8	3	5	8
7	9	0	2	2
7	10	1	6	7
7	11	1	3	4
7	12	1	4	5
7	13	3	5	8
7	14	1	2	3
7	15	3	7	10
7	16	1	8	9
7	17	1	6	7
8	1	5	2	7
8	2	3	0	3
8	3	2	4	6
8	4	2	3	5
8	5	1	2	3
8	6	4	4	8
8	7	3	2	5
8	8	1	3	4
8	9	0	8	8
8	10	0	7	7
8	11	1	5	6
8	12	0	7	7
8	13	1	4	5
8	14	1	5	6
8	15	1	7	8
8	16	0	8	8
8	17	0	5	5
8	18	0	4	4
9	1	1	3	4
9	2	5	0	5
9	3	4	4	8
9	4	1	4	5
9	5	3	2	5
9	6	2	3	5
9	7	1	5	6
9	8	3	4	7
9	9	2	4	6
9	10	1	3	4
9	11	1	6	7
9	12	1	5	6
9	13	2	4	6
9	14	1	5	6
9	15	1	10	11
9	16	1	9	10
9	17	0	6	6
